# Supplementary material for: Integrative Physiological, Transcriptional, and Metabolic Analyses Provide Insights Into Response Mechanisms of Prunus persica to Autotoxicity Stress
Source: Front Plant Sci. 2021 Dec 15;12:794881. doi: 10.3389/fpls.2021.794881 (PMC8714634; doi:10.3389/fpls.2021.794881)
Supplement: Supplementary file 6 [file Table_5.XLSX]

## Sheet: Supplementary Table 5
Supplementary Table 5 Detailed information of all metabolites after BA stress
No.	Metabolite	Metab ID	Formula	KEGG Pathway ID	Retention time	Mode	Quant Mass	CAS ID	HMDB Subclass	HMDB Superclass	KEGG Pathway Second Category	KEGG Pathway First Category	KEGG Compound ID	KEGG Compound First Category	KEGG Compound Second Category	Library ID	Subclass
1	(-)-epinephrine	metab_0	-	map01100;map00350	35.473	pos	400.2	-	-	-	Global and overview maps; Amino acid metabolism	Metabolism;Metabolism	C00788	Hormones and transmitters; Hormones and transmitters	Other hormones; Neurotransmitters	-	-
2	1,2,4,5-tetramethylbenzene	metab_1	-	-	31.517	pos	207	95-93-2	-	-	-	-	C14534	-	-	-	-
3	1,2-cyclohexanedione	metab_2	C6H8O2	-	17.907	pos	392.1	765-87-7	Organooxygen compounds	Organic oxygen compounds	-	-	C06105	-	-	HMDB0031344	Carbonyl compounds
4	1,5-anhydro-D-sorbitol	metab_4	-	-	25.205	pos	105	-	-	-	-	-	C07326	-	-	-	-
5	1-hexadecanol	metab_5	C16H34O	map00071	24.179	pos	387.1	36653-82-4	Fatty Acyls	Lipids and lipid-like molecules	Lipid metabolism	Metabolism	C00823	-	-	LMFA05000061; HMDB0003424	Fatty alcohols
6	1-methylhydantoin	metab_6	-	map01100;map00330	10.88	pos	100	616-04-6	-	-	Global and overview maps;Amino acid metabolism	Metabolism;Metabolism	C02565	-	-	-	-
7	1-methyl-L-tryptophan	metab_7	-	-	6.008	pos	221.1	-	-	-	-	-	-	-	-	-	-
8	1-octadecene	metab_8	C18H36	-	21.047	pos	333.1	112-88-9	-	-	-	-	-	-	-	LMFA11000325	-
9	1-octanol	metab_9	-	-	36.485	pos	187.1	111-87-5	-	-	-	-	C00756	-	-	-	-
10	1-octen-3-ol	metab_10	-	-	25.787	pos	205.1	3391-86-4	-	-	-	-	C14272	-	-	-	-
11	2,3-butanediol	metab_11	C4H10O2	-	6.326	pos	147	513-85-9	Organooxygen compounds	Organic oxygen compounds	-	-	C00265	-	-	HMDB0003156	Alcohols and polyols
12	2,3-dihydroxybiphenyl	metab_12	-	map01100	13.59	pos	257.1	1133-63-7	-	-	Global and overview maps	Metabolism	C02526	-	-	-	-
13	2,3-dihydroxypyridine?	metab_13	-	-	10.525	pos	240.2	-	-	-	-	-	-	-	-	-	-
14	2',5'-Dihydroxy-4-Methoxychalcone	metab_14	C16H14O4	-	28.162	pos	399.3	6342-92-3	-	-	-	-	-	-	-	LMPK12120194	-
15	2,8-quinolinediol	metab_15	-	-	21.953	pos	392.1	-	-	-	-	-	-	-	-	-	-
16	2-aminooctanoic acid	metab_16	C8H17NO2	-	20.208	pos	361.1	644-90-6	Carboxylic acids and derivatives	Organic acids and derivatives	-	-	-	-	-	HMDB0000991	Amino acids, peptides, and analogues
17	2-butyne-1,4-diol	metab_17	-	-	14.691	pos	349.1	110-65-6	-	-	-	-	C02497	-	-	-	-
18	2'-Deoxyadenosine 3' :5'-cyclic monophosphate	metab_18	-	-	34.826	pos	199.1	-	-	-	-	-	-	-	-	-	-
19	2-ethylcaproic acid	metab_19	-	-	6.269	pos	207	-	-	-	-	-	-	-	-	-	-
20	2-ethyltoluene	metab_20	-	-	19.458	pos	105	-	-	-	-	-	C14572	-	-	-	-
21	2-hexenoic acid	metab_22	-	-	25.998	pos	133	1191-04-4	-	-	-	-	-	-	-	-	-
22	2-hydroxybiphenyl	metab_23	-	-	24.351	pos	217.1	-	-	-	-	-	C02499	-	-	-	-
23	2-hydroxypyridine	metab_24	C5H5NO	-	5.935	pos	152	142-08-5	Pyridines and derivatives	Organoheterocyclic compounds	-	-	C02502	-	-	HMDB0013751	Hydropyridines
24	2-hydroxyquinoline	metab_25	-	-	26.621	pos	116	-	-	-	-	-	C06338	-	-	-	-
25	2-phenylacetamide	metab_26	C8H9NO	map00360	36.486	pos	95.1	103-81-1	Benzene and substituted derivatives	Benzenoids	Amino acid metabolism	Metabolism	C02505	-	-	HMDB0010715	Phenylacetamides
26	2-piperidone	metab_27	-	-	12.073	pos	174.1	675-20-7	-	-	-	-	-	-	-	-	-
27	2-undecanone	metab_28	C11H22O	-	13.893	pos	87	112-12-9	Organooxygen compounds	Organic oxygen compounds	-	-	C01875	-	-	HMDB0033713	Carbonyl compounds
28	3-(methylthio)-propylamine	metab_29	-	-	7.807	pos	174.1	-	-	-	-	-	-	-	-	-	-
29	3,4-dihydroxybenzoic acid	metab_30	C7H6O4	map01100;map00400;map01110	17.987	pos	389.1	99-50-3	Benzene and substituted derivatives	Benzenoids	Global and overview maps;Amino acid metabolism;Global and overview maps	Metabolism;Metabolism;Metabolism	C00230	-	-	HMDB0001856	Benzoic acids and derivatives
30	3,5-dihydroxyphenylglycine	metab_31	-	-	8.862	pos	147	-	-	-	-	-	-	-	-	-	-
31	3,7-Dihydroxyflavone	metab_32	C15H10O4	-	25.845	pos	383.2	-	-	-	-	-	-	-	-	LMPK12111545	-
32	3-hydroxyflavone	metab_34	C15H10O3	-	5.974	pos	207	577-85-5	Flavonoids	Phenylpropanoids and polyketides	-	-	C01495	-	-	HMDB0031816	Flavones
33	3-methyl-L-histidine	metab_35	-	map00340	21.603	pos	325.1	-	-	-	Amino acid metabolism	Metabolism	C01152	-	-	-	-
34	4,8-dihydroxyquinoline-2-carboxylic acid (xanthurenic acid)	metab_36	-	-	27.999	pos	332.2	-	-	-	-	-	-	-	-	-	-
35	4-Acetoxyphenol	metab_37	-	-	26.647	pos	254.2	-	-	-	-	-	-	-	-	-	-
36	4-hydroxy-3-methoxybenzoic acid	metab_38	C8H8O4	-	17.226	pos	267.1	121-34-6	Benzene and substituted derivatives	Benzenoids	-	-	C06672	-	-	HMDB0000484	Benzoic acids and derivatives
37	4-hydroxybenzoic acid	metab_39	C7H6O3	map01100;map00130;map01110;map00360	15.295	pos	267.1	99-96-7	Benzene and substituted derivatives	Benzenoids	Global and overview maps;Metabolism of cofactors and vitamins;Global and overview maps;Amino acid metabolism	Metabolism;Metabolism;Metabolism;Metabolism	C00156	-	-	HMDB0000500	Benzoic acids and derivatives
38	4-hydroxybenzyl cyanide	metab_40	-	-	11.221	pos	190.1	-	-	-	-	-	C03766	-	-	-	-
39	4-hydroxypyridine	metab_41	-	-	7.603	pos	152	-	-	-	-	-	-	-	-	-	-
40	4-hydroxyquinoline	metab_42	-	-	30.922	pos	219.1	611-36-9	-	-	-	-	C06343	-	-	-	-
41	4-isopropylbenzoic acid	metab_43	C10H12O2	-	13.356	pos	245.1	536-66-3	Prenol lipids	Lipids and lipid-like molecules	-	-	C06578	-	-	HMDB0035268	Monoterpenoids
42	4-Methyldaphnetin	metab_44	-	-	19.751	pos	319.2	-	-	-	-	-	-	-	-	-	-
43	4-nitrocatechol	metab_45	C6H5NO4	-	16.112	pos	284	3316-09-04	Phenols	Benzenoids	-	-	C02235	-	-	HMDB0002916	Nitrophenols
44	4-O-Methylphloracetophenone	metab_46	-	-	20.392	pos	311.2	-	-	-	-	-	C10680;C00774	-	-	-	-
45	4-vinylphenol	metab_47	-	map00940	15.745	pos	355.2	-	-	-	Biosynthesis of other secondary metabolites	Metabolism	C05627	-	-	-	-
46	5,6 - dimethylbenzimidazole	metab_48	-	-	18.528	pos	218.1	-	-	-	-	-	-	-	-	-	-
47	5,6-dihydro-5-methyluracil	metab_49	-	-	36.486	pos	107.1	-	-	-	-	-	C00906	-	-	-	-
48	5alpha-Androstan-3,7-Dione	metab_50	-	-	24.358	pos	389.1	-	-	-	-	-	-	-	-	-	-
49	5-aminovaleric acid	metab_51	-	map00310;map00330	18.383	pos	174.1	660-88-8	-	-	Amino acid metabolism;Amino acid metabolism	Metabolism;Metabolism	C00431	-	-	-	-
50	5-Hydroxy-2',4',7,8-Tetramethoxyflavone	metab_52	-	-	20.149	pos	415.2	-	-	-	-	-	-	-	-	-	-
51	5-hydroxy-L-tryptophan	metab_54	C11H12N2O3	map01100;map00380	18.528	pos	218.1	4350-09-08	Indoles and derivatives	Organoheterocyclic compounds	Global and overview maps;Amino acid metabolism	Metabolism;Metabolism	C00643	-	-	HMDB0000472	Tryptamines and derivatives
52	5-methoxy-3-indoleacetic acid	metab_55	-	map00380	13.116	pos	349.1	-	-	-	Amino acid metabolism	Metabolism	C05660	-	-	-	-
53	9-phenanthrenol	metab_56	-	-	30.14	pos	265.1	-	-	-	-	-	C11430	-	-	-	-
54	acetanilide	metab_57	-	-	23.489	pos	337.2	103-84-4	-	-	-	-	C07565	-	-	-	-
55	acetol	metab_59	-	map00640	30.923	pos	199.1	-	-	-	Carbohydrate metabolism	Metabolism	C01405;C05235	-	-	-	-
56	adrenaline	metab_61	-	map01100;map00350	27.944	pos	355.2	-	-	-	Global and overview maps;Amino acid metabolism	Metabolism;Metabolism	C00788	Hormones and transmitters;Hormones and transmitters	Other hormones;Neurotransmitters	-	-
57	allo-inositol	metab_62	C6H12O6	-	21.525	pos	265.1	643-10-7	Organooxygen compounds	Organic oxygen compounds	-	-	-	-	-	HMDB0240211	Alcohols and polyols
58	Antiarol	metab_63	-	-	8.292	pos	241	-	-	-	-	-	C10765	-	-	-	-
59	aspartic acid	metab_65	-	map01100;map00220;map01110;map00770;map00300;map00760;map01210;map00270;map01200;map00260;map01230;map00460;map00250;map00710;map00970;map00261;map02010;map00410;map00340	12.256	pos	160.1	-	-	-	Global and overview maps;Amino acid metabolism;Global and overview maps;Metabolism of cofactors and vitamins;Amino acid metabolism;Metabolism of cofactors and vitamins;Global and overview maps;Amino acid metabolism;Global and overview maps;Amino acid metabolism;Global and overview maps;Metabolism of other amino acids;Amino acid metabolism;Energy metabolism;Translation;Biosynthesis of other second…	Metabolism;Metabolism;Metabolism;Metabolism;Metabolism;Metabolism;Metabolism;Metabolism;Metabolism;Metabolism;Metabolism;Metabolism;Metabolism;Metabolism;Genetic Information Processing;Metabolism;Environmental Information Processing;Metabolism;Metabolism	C00402;C00049;C16433	Peptides;Peptides;Hormones and transmitters;-	Amino acids;Amino acids;Neurotransmitters;-	-	-
60	benzoic acid	metab_66	C7H6O2	map01100;map01110;map00360	9.342	pos	179	65-85-0	Benzene and substituted derivatives	Benzenoids	Global and overview maps;Global and overview maps;Amino acid metabolism	Metabolism;Metabolism;Metabolism	C00261;C00539;C09815;C00180	-	-	HMDB0001870	Benzoic acids and derivatives
61	benzoin	metab_67	C14H12O2	-	13.138	pos	179	119-53-9	Stilbenes	Phenylpropanoids and polyketides	-	-	C01408	-	-	HMDB0032039	Benzoins
62	benzoquinone	metab_68	-	-	11.897	pos	239.1	-	-	-	-	-	C00472	-	-	-	-
63	benzoylformic acid	metab_69	-	map00360	8.291	pos	133	-	-	-	Amino acid metabolism	Metabolism	C02137	-	-	-	-
64	Benzphetamine	metab_70	C17H21N	-	29.965	pos	194.1	156-08-1	Benzene and substituted derivatives	Benzenoids	-	-	C07538	-	-	HMDB0015003	Phenethylamines
65	benzyl isothiocyanate	metab_71	C8H7NS	-	14.687	pos	276.1	622-78-6	Benzene and substituted derivatives	Benzenoids	-	-	C03098	-	-	HMDB0033969	-
66	Beta- alanine	metab_72	-	-	12.325	pos	248.1	-	-	-	-	-	-	-	-	-	-
67	beta-gentiobiose	metab_73	-	-	28.244	pos	361.1	-	-	-	-	-	-	-	-	-	-
68	beta-hydroxyisovalerate	metab_74	-	-	5.178	pos	263.1	-	-	-	-	-	-	-	-	-	-
69	beta-ionone	metab_75	C13H20O	-	21.833	pos	205.1	79-77-6	Prenol lipids	Lipids and lipid-like molecules	-	-	C12287	-	-	HMDB0036565	Sesquiterpenoids
70	caffeine	metab_78	C8H10N4O2	map01100;map01110;map00232	5.173	pos	193	1958-08-02	Imidazopyrimidines	Organoheterocyclic compounds	Global and overview maps;Global and overview maps;Biosynthesis of other secondary metabolites	Metabolism;Metabolism;Metabolism	C07481	-	-	HMDB0001847	Purines and purine derivatives
71	cellotetraose	metab_79	-	-	29.036	pos	361.1	-	-	-	-	-	C02013	-	-	-	-
72	citraconic acid	metab_80	C5H6O4	map01100;map01210;map00660;map00290	10.932	pos	241	498-23-7	Fatty Acyls	Lipids and lipid-like molecules	Global and overview maps;Global and overview maps;Carbohydrate metabolism;Amino acid metabolism	Metabolism;Metabolism;Metabolism;Metabolism	C02226	-	-	HMDB0000634;LMFA01170099	Fatty acids and conjugates
73	citramalic acid	metab_81	C5H8O5	-	15.103	pos	247.1	597-44-4	Fatty Acyls	Lipids and lipid-like molecules	-	-	C00815	-	-	HMDB0000426	Fatty acids and conjugates
74	citric acid	metab_82	C6H8O7	map01100;map00630;map01110;map01210;map01200;map01230;map00250;map00020	18.117	pos	273.1	77-92-9	Carboxylic acids and derivatives	Organic acids and derivatives	Global and overview maps;Carbohydrate metabolism;Global and overview maps;Global and overview maps;Global and overview maps;Global and overview maps;Amino acid metabolism;Carbohydrate metabolism	Metabolism;Metabolism;Metabolism;Metabolism;Metabolism;Metabolism;Metabolism;Metabolism	C00158	Organic acids	Carboxylic acids	HMDB0000094	Tricarboxylic acids and derivatives
75	D-(+) trehalose	metab_83	-	-	28.668	pos	361.1	-	-	-	-	-	-	-	-	-	-
76	D-Ala-D-Ala2	metab_84	-	-	11.22	pos	116	-	-	-	-	-	-	-	-	-	-
77	D-allose	metab_85	-	map02010;map00051	28.658	pos	205.1	-	-	-	Membrane transport;Carbohydrate metabolism	Environmental Information Processing;Metabolism	C01487	Carbohydrates	Monosaccharides	-	-
78	dehydroascorbic acid	metab_86	C6H6O6	map01100;map00480;map00053	26.406	pos	371.2	490-83-5	Lactones	Organoheterocyclic compounds	Global and overview maps;Metabolism of other amino acids;Carbohydrate metabolism	Metabolism;Metabolism;Metabolism	C00425;C05422	-	-	HMDB0001264	Gamma butyrolactones
79	D-glucose	metab_87	C6H12O6	map01100;map01110;map02010;map00520;map01200;map00051;map00901;map00052;map00010;map00500;map00030;map04933	19.506	pos	205.1	50-99-7	Organooxygen compounds	Organic oxygen compounds	Global and overview maps;Global and overview maps;Membrane transport;Carbohydrate metabolism;Global and overview maps;Carbohydrate metabolism;Biosynthesis of other secondary metabolites;Carbohydrate metabolism;Carbohydrate metabolism;Carbohydrate metabolism;Carbohydrate metabolism;Endocrine and metabolic diseases	Metabolism;Metabolism;Environmental Information Processing;Metabolism;Metabolism;Metabolism;Metabolism;Metabolism;Metabolism;Metabolism;Metabolism;Human Diseases	C00267;C00221;C00031	-;-;Carbohydrates	-;-;Monosaccharides	HMDB0000122	Carbohydrates and carbohydrate conjugates
80	dibenzofuran	metab_88	-	map01100	5.566	pos	107.1	132-64-9	-	-	Global and overview maps	Metabolism	C07729	-	-	-	-
81	dioctyl phthalate	metab_90	-	-	25.975	pos	167	117-84-0	-	-	-	-	C03690	-	-	-	-
82	DL-3,4-dihydroxyphenyl glycol	metab_91	-	-	29.262	pos	368.2	-	-	-	-	-	-	-	-	-	-
83	DL-4-hydroxymandelic acid	metab_92	-	-	13.637	pos	267.1	-	-	-	-	-	C11527	-	-	-	-
84	D-lyxose	metab_93	-	map00040	15.862	pos	103	-	-	-	Carbohydrate metabolism	Metabolism	C00476;C08348	Carbohydrates;-	Monosaccharides;-	-	-
85	D-malic acid	metab_94	C4H6O5	map00650	13.354	pos	147	636-61-3	Fatty Acyls	Lipids and lipid-like molecules	Carbohydrate metabolism	Metabolism	C00497	-	-	HMDB0031518	Fatty acids and conjugates
86	D-mannitol	metab_95	-	map02010;map00051	19.759	pos	320.2	69-65-8	-	-	Membrane transport;Carbohydrate metabolism	Environmental Information Processing;Metabolism	C00392	Carbohydrates	Monosaccharides	-	-
87	D-saccharic acid	metab_96	-	map01100;map00053	18.039	pos	292.1	-	-	-	Global and overview maps;Carbohydrate metabolism	Metabolism;Metabolism	C00818	-	-	-	-
88	D-sorbitol	metab_97	-	map01100;map02010;map00051;map00052	23.714	pos	290.1	-	-	-	Global and overview maps;Membrane transport;Carbohydrate metabolism;Carbohydrate metabolism	Metabolism;Environmental Information Processing;Metabolism;Metabolism	C00794	Carbohydrates	Monosaccharides	-	-
89	D-sphingosine	metab_98	-	-	17.938	pos	204.1	-	-	-	-	-	-	-	-	-	-
90	eicosane	metab_99	C20H42	-	23.903	pos	204.1	112-95-8	Alkanes	Hydrocarbons	-	-	-	-	-	HMDB0059909;LMFA11000571	Acyclic alkanes
91	eicosapentaenoic acid	metab_100	C20H30O2	map01040	23.906	pos	305.1	10417-94-4	Fatty Acyls	Lipids and lipid-like molecules	Lipid metabolism	Metabolism	C06428	Lipids	Fatty acids	HMDB0001999	Fatty acids and conjugates
92	epicatechin	metab_101	C15H14O6	map00941;map01110	28.876	pos	355.2	490-46-0	Flavonoids	Phenylpropanoids and polyketides	Biosynthesis of other secondary metabolites;Global and overview maps	Metabolism;Metabolism	C09727;C06562	-	-	LMPK12020003;HMDB0001871	Flavans
93	ethanolamine	metab_102	C2H7NO	map01100;map00564	17.074	pos	174.1	141-43-5	Organonitrogen compounds	Organic nitrogen compounds	Global and overview maps;Lipid metabolism	Metabolism;Metabolism	C00189	Peptides	Amines	HMDB0000149	Amines
94	farnesal	metab_103	-	map00909;map00900	23.759	pos	145	-	-	-	Metabolism of terpenoids and polyketides;Metabolism of terpenoids and polyketides	Metabolism;Metabolism	C16501;C03461	-	-	-	-
95	fluorene	metab_104	-	map01100	19.458	pos	165	86-73-7	-	-	Global and overview maps	Metabolism	C07715	-	-	-	-
96	Flurazepam	metab_105	C21H23ClFN3O	-	7.827	pos	86	17617-23-1	Benzodiazepines	Organoheterocyclic compounds	-	-	-	-	-	HMDB0014828	1,4-benzodiazepines
97	fructose-1,6-diphosphate	metab_107	-	map01100;map00400;map01110;map01200;map00710	24.045	pos	315.1	-	-	-	Global and overview maps;Amino acid metabolism;Global and overview maps;Global and overview maps;Energy metabolism	Metabolism;Metabolism;Metabolism;Metabolism;Metabolism	C00354	-	-	-	-
98	fumaric acid	metab_108	C4H4O4	map01100;map00220;map01110;map00350;map00650;map01200;map00620;map00760;map00250;map00360;map00020;map00190	10.986	pos	245.1	136723-16-5;110-17-8	Carboxylic acids and derivatives	Organic acids and derivatives	Global and overview maps;Amino acid metabolism;Global and overview maps;Amino acid metabolism;Carbohydrate metabolism;Global and overview maps;Carbohydrate metabolism;Metabolism of cofactors and vitamins;Amino acid metabolism;Amino acid metabolism;Carbohydrate metabolism;Energy metabolism	Metabolism;Metabolism;Metabolism;Metabolism;Metabolism;Metabolism;Metabolism;Metabolism;Metabolism;Metabolism;Metabolism;Metabolism	C00122	-	-	HMDB0000134	Dicarboxylic acids and derivatives
99	galactinol	metab_109	C12H22O11	map00052	29.625	pos	204.1	-	Organooxygen compounds	Organic oxygen compounds	Carbohydrate metabolism	Metabolism	C01235	-	-	HMDB0005826	Carbohydrates and carbohydrate conjugates
100	galactonic acid	metab_110	C6H12O7	map01100;map00052	20.572	pos	333.1	13382-27-9	Hydroxy acids and derivatives	Organic acids and derivatives	Global and overview maps;Carbohydrate metabolism	Metabolism;Metabolism	C00880	-	-	HMDB0000565	Medium-chain hydroxy acids and derivatives
101	galactosamine	metab_111	-	-	26.789	pos	116	7535-00-4	-	-	-	-	-	-	-	-	-
102	galacturonic acid	metab_112	C6H10O7	-	19.868	pos	333.1	14982-50-4	Organooxygen compounds	Organic oxygen compounds	-	-	C08348	-	-	HMDB0002545	Carbohydrates and carbohydrate conjugates
103	gluconic acid	metab_113	C6H12O7	map01100;map00030;map01110;map01200	20.53	pos	292.1	133-42-6;526-95-4	Organooxygen compounds	Organic oxygen compounds	Global and overview maps;Carbohydrate metabolism;Global and overview maps;Global and overview maps	Metabolism;Metabolism;Metabolism;Metabolism	C00257	Carbohydrates	Monosaccharides	HMDB0000625	Carbohydrates and carbohydrate conjugates
104	glyceric acid	metab_114	C3H6O4	map01100;map00630;map01110;map00561;map01200;map00260;map00030	10.84	pos	292.1	473-81-4	Organooxygen compounds	Organic oxygen compounds	Global and overview maps;Carbohydrate metabolism;Global and overview maps;Lipid metabolism;Global and overview maps;Amino acid metabolism;Carbohydrate metabolism	Metabolism;Metabolism;Metabolism;Metabolism;Metabolism;Metabolism;Metabolism	C00258	-	-	HMDB0000139	Carbohydrates and carbohydrate conjugates
105	glycerol-phosphate	metab_115	-	-	17.39	pos	299.2	-	-	-	-	-	-	-	-	-	-
106	glycolic acid	metab_116	C2H4O3	map01100;map00630;map01110;map01200;map00071	6.426	pos	221.1	79-14-1	Hydroxy acids and derivatives	Organic acids and derivatives	Global and overview maps;Carbohydrate metabolism;Global and overview maps;Global and overview maps;Lipid metabolism	Metabolism;Metabolism;Metabolism;Metabolism;Metabolism	C03547;C00160	-	-	HMDB0000115	Alpha hydroxy acids and derivatives
107	glycylproline	metab_117	C7H12N2O3	-	12.239	pos	373.1	704-15-4	Carboxylic acids and derivatives	Organic acids and derivatives	-	-	-	-	-	HMDB0000721	Amino acids, peptides, and analogues
108	heptadecanoic acid	metab_118	C17H34O2	-	21.747	pos	327.1	506-12-7	Fatty Acyls	Lipids and lipid-like molecules	-	-	-	-	-	HMDB0002259;LMFA01010017	Fatty acids and conjugates
109	hyoscyamine (atropine)	metab_119	-	-	22.27	pos	125.1	-	-	-	-	-	-	-	-	-	-
110	hypotaurine	metab_120	C2H7NO2S	map01100;map00430	17.611	pos	299.2	300-84-5	Sulfinic acids and derivatives	Organic acids and derivatives	Global and overview maps;Metabolism of other amino acids	Metabolism;Metabolism	C00519	-	-	HMDB0000965	Sulfinic acids
111	hypoxanthine	metab_121	C5H4N4O	map01100;map00230	29.259	pos	370.2	68-94-0	Imidazopyrimidines	Organoheterocyclic compounds	Global and overview maps;Nucleotide metabolism	Metabolism;Metabolism	C00262	-	-	HMDB0000157	Purines and purine derivatives
112	inosine	metab_122	C10H12N4O5	map01100;map00230	26.466	pos	245.1	58-63-9	Purine nucleosides	Nucleosides, nucleotides, and analogues	Global and overview maps;Nucleotide metabolism	Metabolism;Metabolism	C00294	-	-	HMDB0000195	-
113	kestose	metab_123	-	-	27.739	pos	314.1	-	-	-	-	-	-	-	-	-	-
114	L-alanine	metab_124	C3H7NO2	map01100;map00450;map01200;map01502;map00430;map00460;map00270;map02010;map01230;map00250;map00710;map00970;map04122	6.971	pos	116	56-41-7	Carboxylic acids and derivatives	Organic acids and derivatives	Global and overview maps;Metabolism of other amino acids;Global and overview maps;Drug resistance: Antimicrobial;Metabolism of other amino acids;Metabolism of other amino acids;Amino acid metabolism;Membrane transport;Global and overview maps;Amino acid metabolism;Energy metabolism;Translation;Folding, sorting and degradation	Metabolism;Metabolism;Metabolism;Human Diseases;Metabolism;Metabolism;Metabolism;Environmental Information Processing;Metabolism;Metabolism;Metabolism;Genetic Information Processing;Genetic Information Processing	C00041;C00133;C01401	Peptides;Peptides;-	Amino acids;Amino acids;-	HMDB0000161	Amino acids, peptides, and analogues
115	L-allothreonine	metab_125	C4H9NO3	map01100;map00260	10.186	pos	219.1	24830-94-2	Carboxylic acids and derivatives	Organic acids and derivatives	Global and overview maps;Amino acid metabolism	Metabolism;Metabolism	C05519	-	-	HMDB0004041	Amino acids, peptides, and analogues
116	L-asparagine	metab_126	C4H8N2O3	map01100;map01110;map00460;map01230;map00250;map00970	16.057	pos	116	70-47-3	Carboxylic acids and derivatives	Organic acids and derivatives	Global and overview maps;Global and overview maps;Metabolism of other amino acids;Global and overview maps;Amino acid metabolism;Translation	Metabolism;Metabolism;Metabolism;Metabolism;Metabolism;Genetic Information Processing	C00152	Peptides	Amino acids	HMDB0000168	Amino acids, peptides, and analogues
117	L-cysteine	metab_127	C3H7NO2S	map01100;map00480;map01110;map00770;map00920;map00430;map00730;map00270;map01200;map01230;map00460;map00260;map04122;map00970	7.019	pos	265.1	52-90-4	Carboxylic acids and derivatives	Organic acids and derivatives	Global and overview maps;Metabolism of other amino acids;Global and overview maps;Metabolism of cofactors and vitamins;Energy metabolism;Metabolism of other amino acids;Metabolism of cofactors and vitamins;Amino acid metabolism;Global and overview maps;Global and overview maps;Metabolism of other amino acids;Amino acid metabolism;Folding, sorting and degradation;Translation	Metabolism;Metabolism;Metabolism;Metabolism;Metabolism;Metabolism;Metabolism;Metabolism;Metabolism;Metabolism;Metabolism;Metabolism;Genetic Information Processing;Genetic Information Processing	C00097	Peptides	Amino acids	HMDB0000574	Amino acids, peptides, and analogues
118	L-galactono-gamma-lactone	metab_129	-	-	21.521	pos	73	-	-	-	-	-	-	-	-	-	-
119	L-glutamic acid (dehydrated)	metab_130	-	-	13.821	pos	156.1	-	-	-	-	-	-	-	-	-	-
120	L-histidine	metab_131	C6H9N3O2	map01100;map01110;map00340;map02010;map01230;map00970;map00410	18.738	pos	436.2	71-00-1	Carboxylic acids and derivatives	Organic acids and derivatives	Global and overview maps;Global and overview maps;Amino acid metabolism;Membrane transport;Global and overview maps;Translation;Metabolism of other amino acids	Metabolism;Metabolism;Metabolism;Environmental Information Processing;Metabolism;Genetic Information Processing;Metabolism	C00135	Peptides	Amino acids	HMDB0000177	Amino acids, peptides, and analogues
121	L-homoserine	metab_132	C4H9NO3	map01100;map01110;map00300;map00270;map01230;map00260;map00920	23.714	pos	290.1	672-15-1	Carboxylic acids and derivatives	Organic acids and derivatives	Global and overview maps;Global and overview maps;Amino acid metabolism;Amino acid metabolism;Global and overview maps;Amino acid metabolism;Energy metabolism	Metabolism;Metabolism;Metabolism;Metabolism;Metabolism;Metabolism;Metabolism	C00263	Peptides	Amino acids	HMDB0000719	Amino acids, peptides, and analogues
122	linoleic acid	metab_133	C18H32O2	map01100;map00591;map01040	22.505	pos	337.2	60-33-3	Fatty Acyls	Lipids and lipid-like molecules	Global and overview maps;Lipid metabolism;Lipid metabolism	Metabolism;Metabolism;Metabolism	C01595	Lipids	Fatty acids	LMFA01030120;HMDB0000673	Lineolic acids and derivatives
123	L-proline	metab_134	C5H9NO2	map01100;map01110;map02010;map00330;map01230;map00970	14.691	pos	275.1	147-85-3	Carboxylic acids and derivatives	Organic acids and derivatives	Global and overview maps;Global and overview maps;Membrane transport;Amino acid metabolism;Global and overview maps;Translation	Metabolism;Metabolism;Environmental Information Processing;Metabolism;Metabolism;Genetic Information Processing	C00148	Peptides	Amino acids	HMDB0000162	Amino acids, peptides, and analogues
124	L-serine	metab_135	C3H7NO3	map01100;map00630;map01110;map00920;map01502;map00460;map00270;map01200;map01230;map00600;map02010;map00260;map00261;map00970	16.87	pos	217.1	56-45-1	Carboxylic acids and derivatives	Organic acids and derivatives	Global and overview maps;Carbohydrate metabolism;Global and overview maps;Energy metabolism;Drug resistance: Antimicrobial;Metabolism of other amino acids;Amino acid metabolism;Global and overview maps;Global and overview maps;Lipid metabolism;Membrane transport;Amino acid metabolism;Biosynthesis of other secondary metabolites;Translation	Metabolism;Metabolism;Metabolism;Metabolism;Human Diseases;Metabolism;Metabolism;Metabolism;Metabolism;Metabolism;Environmental Information Processing;Metabolism;Metabolism;Genetic Information Processing	C00065	Peptides	Amino acids	HMDB0000187	Amino acids, peptides, and analogues
125	maleamic acid	metab_138	-	map00760	14.303	pos	244.1	-	-	-	Metabolism of cofactors and vitamins	Metabolism	C01596	-	-	-	-
126	maleic acid	metab_139	C4H4O4	map01100;map00220;map01110;map00350;map00650;map01200;map00620;map00760;map00250;map00360;map00020;map00190	10.394	pos	147	110-16-7	Carboxylic acids and derivatives	Organic acids and derivatives	Global and overview maps;Amino acid metabolism;Global and overview maps;Amino acid metabolism;Carbohydrate metabolism;Global and overview maps;Carbohydrate metabolism;Metabolism of cofactors and vitamins;Amino acid metabolism;Amino acid metabolism;Carbohydrate metabolism;Energy metabolism	Metabolism;Metabolism;Metabolism;Metabolism;Metabolism;Metabolism;Metabolism;Metabolism;Metabolism;Metabolism;Metabolism;Metabolism	C00122;C01384	-	-	HMDB0000176	Dicarboxylic acids and derivatives
127	malonic acid	metab_140	C3H4O4	map00240;map00410	8.677	pos	147	141-82-2	Carboxylic acids and derivatives	Organic acids and derivatives	Nucleotide metabolism;Metabolism of other amino acids	Metabolism;Metabolism	C04025;C00383	-;Organic acids	-;Carboxylic acids	LMFA01170041;HMDB0000691	Dicarboxylic acids and derivatives
128	mandelic acid	metab_141	C8H8O3	-	13.138	pos	179	90-64-2	Benzene and substituted derivatives	Benzenoids	-	-	C01984	-	-	HMDB0000703	-
129	mandelonitrile	metab_142	C8H7NO	map00460;map01110	11.221	pos	190.1	-	Benzene and substituted derivatives	Benzenoids	Metabolism of other amino acids;Global and overview maps	Metabolism;Metabolism	C00561	-	-	HMDB0060486	-
130	melatonin	metab_143	C13H16N2O2	map01100;map00380	25.344	pos	237.1	73-31-4	Indoles and derivatives	Organoheterocyclic compounds	Global and overview maps;Amino acid metabolism	Metabolism;Metabolism	C01598	Hormones and transmitters	Other hormones	HMDB0001389	Indoles
131	Methamphetamine	metab_144	C10H15N	-	26.97	pos	171	537-46-2	Benzene and substituted derivatives	Benzenoids	-	-	C07164	-	-	HMDB0015517	Phenethylamines
132	Methaqualone	metab_145	C16H14N2O	-	30.832	pos	483.2	72-44-6	Organoheterocyclic compounds	Organic compounds	-	-	C07560	-	-	HMDB0240285	Diazanaphthalenes
133	methyl-beta-D-galactopyranoside	metab_146	-	-	26	pos	204.1	-	-	-	-	-	-	-	-	-	-
134	mono(2-ethylhexyl)phthalate	metab_147	-	-	8.425	pos	267.1	-	-	-	-	-	C03343	-	-	-	-
135	N- carbobenzoxy-L-leucine	metab_148	-	-	23.716	pos	316.1	-	-	-	-	-	-	-	-	-	-
136	N,N-dimethyl-1,4-phenylenediamine	metab_149	-	-	15.385	pos	280.1	-	-	-	-	-	C04203	-	-	-	-
137	N-acetyl-D-tryptophan	metab_150	-	-	37.049	pos	320.2	-	-	-	-	-	C03137	-	-	-	-
138	N-cyclohexylformamide	metab_151	-	-	23.34	pos	122.1	766-93-8	-	-	-	-	C11519	-	-	-	-
139	N-gamma-acetyl-N-2-formyl-5-methoxykynurenamine	metab_152	-	-	23.339	pos	136	-	-	-	-	-	-	-	-	-	-
140	nicotinamide	metab_153	-	map01100;map00760	5.376	pos	121.1	-	-	-	Global and overview maps;Metabolism of cofactors and vitamins	Metabolism;Metabolism	C00153	Vitamins and Cofactors	Vitamins	-	-
141	nicotinic acid	metab_154	C6H5NO2	map01100;map00960;map01110;map00760	10.158	pos	180	59-67-6	Pyridines and derivatives	Organoheterocyclic compounds	Global and overview maps;Biosynthesis of other secondary metabolites;Global and overview maps;Metabolism of cofactors and vitamins	Metabolism;Metabolism;Metabolism;Metabolism	C00253;C05380	Vitamins and Cofactors;-	Vitamins;-	HMDB0001488	Pyridinecarboxylic acids and derivatives
142	N-omega-acetylhistamine	metab_155	-	map00340	25.402	pos	209	-	-	-	Amino acid metabolism	Metabolism	C05135	-	-	-	-
143	octopine	metab_156	-	map02010;map00330	23.602	pos	98.1	-	-	-	Membrane transport;Amino acid metabolism	Environmental Information Processing;Metabolism	C04137	-	-	-	-
144	orcinol	metab_157	-	-	12.631	pos	253.1	-	-	-	-	-	C00727	-	-	-	-
145	oxalic acid	metab_158	C2H2O4	map01100;map00630	7.623	pos	147	7404-49-1;144-62-7	Carboxylic acids and derivatives	Organic acids and derivatives	Global and overview maps;Carbohydrate metabolism	Metabolism;Metabolism	C00209	Organic acids	Carboxylic acids	HMDB0002329	Dicarboxylic acids and derivatives
146	palmitic acid	metab_159	C16H32O2	map01100;map00071;map01212;map00073;map00061;map00062;map01040	20.621	pos	313.2	1957-10-03	Fatty Acyls	Lipids and lipid-like molecules	Global and overview maps;Lipid metabolism;Global and overview maps;Lipid metabolism;Lipid metabolism;Lipid metabolism;Lipid metabolism	Metabolism;Metabolism;Metabolism;Metabolism;Metabolism;Metabolism;Metabolism	C00249	Lipids	Fatty acids	HMDB0000220;LMFA01010001	Fatty acids and conjugates
147	p-cresol	metab_160	C7H8O	map01100	14.993	pos	180	106-44-5	Phenols	Benzenoids	Global and overview maps	Metabolism	C01468	-	-	HMDB0001858	Cresols
148	p-cymene	metab_161	C10H14	-	37.044	pos	119	99-87-6	Prenol lipids	Lipids and lipid-like molecules	-	-	C06575	-	-	LMPR0102090014;HMDB0005805	Monoterpenoids
149	petunidin-3-glucoside	metab_162	-	-	27.596	pos	372.1	-	-	-	-	-	C12139	-	-	-	-
150	phenanthrene	metab_163	-	map01100	7.623	pos	148	1985-01-08	-	-	Global and overview maps	Metabolism	C11422	-	-	-	-
151	Phentermine	metab_165	C10H15N	-	13.721	pos	87	122-09-8	Benzene and substituted derivatives	Benzenoids	-	-	C07438	-	-	HMDB0014337	Phenethylamines
152	Phenylalanine	metab_166	-	map01100;map01110;map00970;map01210;map00960;map02010;map01230;map00966;map00460;map00940;map00360;map00400	14.151	pos	120	150-30-1	-	-	Global and overview maps;Global and overview maps;Translation;Global and overview maps;Biosynthesis of other secondary metabolites;Membrane transport;Global and overview maps;Biosynthesis of other secondary metabolites;Metabolism of other amino acids;Biosynthesis of other secondary metabolites;Amino acid metabolism;Amino acid metabolism	Metabolism;Metabolism;Genetic Information Processing;Metabolism;Metabolism;Environmental Information Processing;Metabolism;Metabolism;Metabolism;Metabolism;Metabolism;Metabolism	C00079;C02057	Peptides;-	Amino acids;-	-	-
153	phenylphosphoric acid	metab_167	-	-	28.244	pos	481.2	-	-	-	-	-	-	-	-	-	-
154	phlorobenzophenone	metab_168	-	-	17.793	pos	359.1	-	-	-	-	-	-	-	-	-	-
155	phloroglucinol	metab_169	-	map01100;map00790	15.601	pos	342.3	-	-	-	Global and overview maps;Metabolism of cofactors and vitamins	Metabolism;Metabolism	C00268;C02183	-	-	-	-
156	phosphoric acid	metab_170	H3O4P	map01100;map00195;map02010;map00190	22.89	pos	227.1	14265-44-2;14066-19-4;14066-20-7;7664-38-2	Non-metal oxoanionic compounds	Homogeneous non-metal compounds	Global and overview maps;Energy metabolism;Membrane transport;Energy metabolism	Metabolism;Metabolism;Environmental Information Processing;Metabolism	C00009	-	-	HMDB0002105;HMDB0000973;HMDB0001429;HMDB0002142	Non-metal phosphates
157	pipecolic acid	metab_172	C6H11NO2	map01100;map00960;map00310;map01110	13.515	pos	84	535-75-1	Carboxylic acids and derivatives	Organic acids and derivatives	Global and overview maps;Biosynthesis of other secondary metabolites;Amino acid metabolism;Global and overview maps	Metabolism;Metabolism;Metabolism;Metabolism	C00408	-	-	HMDB0000070	Amino acids, peptides, and analogues
158	psicose	metab_173	-	-	18.932	pos	103	-	-	-	-	-	-	-	-	-	-
159	putrescine	metab_174	C4H12N2	map01100;map00480;map01110;map00960;map02010;map00330	16.888	pos	174.1	110-60-1	Organonitrogen compounds	Organic nitrogen compounds	Global and overview maps;Metabolism of other amino acids;Global and overview maps;Biosynthesis of other secondary metabolites;Membrane transport;Amino acid metabolism	Metabolism;Metabolism;Metabolism;Metabolism;Environmental Information Processing;Metabolism	C02896;C00134	-;Peptides	-;Amines	HMDB0001414	Amines
160	pyruvic acid	metab_175	C3H4O3	map01110;map01502;map00270;map00040;map01200;map00330;map00250;map00440;map00350;map00020;map00630;map00770;map00430;map00730;map00710;map00900;map01100;map01210;map00053;map00010;map00360;map01230;map00260;map00261;map00660;map00030;map00760;map00650;map00620;map00290	12.832	pos	174.1	127-17-3	Keto acids and derivatives	Organic acids and derivatives	Global and overview maps;Drug resistance: Antimicrobial;Amino acid metabolism;Carbohydrate metabolism;Global and overview maps;Amino acid metabolism;Amino acid metabolism;Metabolism of other amino acids;Amino acid metabolism;Carbohydrate metabolism;Carbohydrate metabolism;Metabolism of cofactors and vitamins;Metabolism of other amino acids;Metabolism of cofactors and vitamins;Energy metabolism;Me…	Metabolism;Human Diseases;Metabolism;Metabolism;Metabolism;Metabolism;Metabolism;Metabolism;Metabolism;Metabolism;Metabolism;Metabolism;Metabolism;Metabolism;Metabolism;Metabolism;Metabolism;Metabolism;Metabolism;Metabolism;Metabolism;Metabolism;Metabolism;Metabolism;Metabolism;Metabolism;Metabolism;Metabolism;Metabolism;Metabolism	C00022	Organic acids	Carboxylic acids	LMFA01060077;HMDB0000243	Alpha-keto acids and derivatives
161	quinic acid	metab_176	C7H12O6	map00400	18.737	pos	345.1	77-95-2	Organooxygen compounds	Organic oxygen compounds	Amino acid metabolism	Metabolism	C00296;C06746	-	-	HMDB0003072	Alcohols and polyols
162	ribose	metab_177	-	map00030;map02010	16.284	pos	103	-	-	-	Carbohydrate metabolism;Membrane transport	Metabolism;Environmental Information Processing	C00121;C08353	Carbohydrates;-	Monosaccharides;-	-	-
163	sarcosine	metab_178	C3H7NO2	map01100;map00330;map00260	9.558	pos	116	107-97-1	Carboxylic acids and derivatives	Organic acids and derivatives	Global and overview maps;Amino acid metabolism;Amino acid metabolism	Metabolism;Metabolism;Metabolism	C00213	-	-	HMDB0000271	Amino acids, peptides, and analogues
164	squalene	metab_181	C30H50	map01100;map01110;map00909;map00100	32.263	pos	382.3	111-02-4	Prenol lipids	Lipids and lipid-like molecules	Global and overview maps;Global and overview maps;Metabolism of terpenoids and polyketides;Lipid metabolism	Metabolism;Metabolism;Metabolism;Metabolism	C00751	-	-	HMDB0000256;LMPR0106010002	Triterpenoids
165	stigmasterol	metab_182	C29H48O	map01110;map00100	32.62	pos	484.4	83-48-7	Steroids and steroid derivatives	Lipids and lipid-like molecules	Global and overview maps;Lipid metabolism	Metabolism;Metabolism	C05442	Steroids	29-Carbon atoms	LMST01040123;HMDB0000937	Stigmastanes and derivatives
166	succinic acid	metab_183	C4H6O4	map01100;map00630;map00350;map01110;map00640;map00920;map00650;map01200;map00620;map00760;map00250;map00360;map00020;map00190	10.463	pos	147	110-15-6	Carboxylic acids and derivatives	Organic acids and derivatives	Global and overview maps;Carbohydrate metabolism;Amino acid metabolism;Global and overview maps;Carbohydrate metabolism;Energy metabolism;Carbohydrate metabolism;Global and overview maps;Carbohydrate metabolism;Metabolism of cofactors and vitamins;Amino acid metabolism;Amino acid metabolism;Carbohydrate metabolism;Energy metabolism	Metabolism;Metabolism;Metabolism;Metabolism;Metabolism;Metabolism;Metabolism;Metabolism;Metabolism;Metabolism;Metabolism;Metabolism;Metabolism;Metabolism	C00042	Organic acids	Carboxylic acids	LMFA01170043;HMDB0000254	Dicarboxylic acids and derivatives
167	Sucrose	metab_184	C12H22O11	map01100;map00500;map02010;map00052	27.356	pos	362.2	57-50-1	Organooxygen compounds	Organic oxygen compounds	Global and overview maps;Carbohydrate metabolism;Membrane transport;Carbohydrate metabolism	Metabolism;Metabolism;Environmental Information Processing;Metabolism	C00089	Carbohydrates	Oligosaccharides	HMDB0000258	Carbohydrates and carbohydrate conjugates
168	taxifolin?	metab_185	-	-	18.291	pos	368.2	-	-	-	-	-	-	-	-	-	-
169	thioglycolic acid	metab_186	-	-	9.913	pos	314.1	1968-11-01	-	-	-	-	C02086	-	-	-	-
170	threonic acid	metab_187	C4H8O5	map00053	14.544	pos	292.1	3909-12-04	Organooxygen compounds	Organic oxygen compounds	Carbohydrate metabolism	Metabolism	C01620	-	-	HMDB0000943	Carbohydrates and carbohydrate conjugates
171	threose	metab_188	-	-	19.244	pos	205.1	-	-	-	-	-	C01796	Carbohydrates	Monosaccharides	-	-
172	trans caftaric acid	metab_190	-	-	17.718	pos	219.1	-	-	-	-	-	-	-	-	-	-
173	tyramine	metab_191	C8H11NO	map00950;map01110;map00350	6.794	pos	174.1	51-67-2	Benzene and substituted derivatives	Benzenoids	Biosynthesis of other secondary metabolites;Global and overview maps;Amino acid metabolism	Metabolism;Metabolism;Metabolism	C00483	Peptides	Amines	HMDB0000306	Phenethylamines
174	tyrosine methyl ester	metab_192	-	-	13.335	pos	179	1080-06-4	-	-	-	-	C03404	-	-	-	-
175	valeramide	metab_194	-	-	24.158	pos	72	-	-	-	-	-	C01842	-	-	-	-
176	xanthotoxin	metab_195	-	-	22.828	pos	341.2	-	-	-	-	-	C01864	-	-	-	-
177	xylitol	metab_196	-	map01100;map00040;map02010	16.548	pos	217.1	87-99-0	-	-	Global and overview maps;Carbohydrate metabolism;Membrane transport	Metabolism;Metabolism;Environmental Information Processing	C00379	Carbohydrates	Monosaccharides	-	-
