# Supplementary material for: Integrative Physiological, Transcriptional, and Metabolic Analyses Provide Insights Into Response Mechanisms of Prunus persica to Autotoxicity Stress
Source: Front Plant Sci. 2021 Dec 15;12:794881. doi: 10.3389/fpls.2021.794881 (PMC8714634; doi:10.3389/fpls.2021.794881)
Supplement: Supplementary file 7 [file Table_6.XLSX]

## Sheet: Supplementary Table 6
Supplementary Table 6 Detailed information of differentially accumulated metabolites after BA stress
No.	Metabolite	Metab ID	KEGG Compound ID	Library ID	Quant Mass	Mode	Formula	Retention time	CAS ID	KEGG Compound First Category	KEGG Compound Second Category	KEGG Pathway ID	KEGG Pathway First Category	KEGG Pathway Second Category	HMDB Superclass	HMDB Class	HMDB Subclass	RSD	BA_0 h_1	BA_0 h_2	BA_0 h_3	BA_0 h_4	BA_0 h_5	BA_0 h_6	BA_72 h_1	BA_72 h_2	BA_72 h_3	BA_72 h_4	BA_72 h_5	BA_72 h_6	BA_120 h_1	BA_120 h_2	BA_120 h_3	BA_120 h_4	BA_120 h_5	BA_120 h_6
1	1,2-cyclohexanedione	metab_2	C06105	HMDB0031344	392.1	pos	C6H8O2	17.907	765-87-7	-	-	-	-	-	Organic oxygen compounds	Organooxygen compounds	Carbonyl compounds	0.0014	4.376	4.4082	4.1532	4.0736	4.138	4.5565	5.2284	5.4294	5.4965	5.4575	5.3887	5.3969	5.37	5.0867	5.317	5.3832	5.3887	5.4265
2	1,5-anhydro-D-sorbitol	metab_4	C07326	-	105	pos	-	25.205	-	-	-	-	-	-	-	-	-	0.0005	4.5339	4.764	5.3639	4.6056	4.9086	4.6097	6.9242	6.4565	5.9689	6.3619	6.4116	6.4244	6.4391	7.2986	6.8542	6.3871	6.8368	6.5275
3	1-methylhydantoin	metab_6	C02565	-	100	pos	-	10.88	616-04-6	-	-	map01100;map00330	Metabolism;Metabolism	Global and overview maps;Amino acid metabolism	-	-	-	0.0071	5.5743	5.8932	5.8962	5.9233	5.9852	6.0193	5.1622	5.071	5.2285	4.918	5.0687	4.8141	4.8535	4.9992	4.9381	4.834	5.0078	4.9823
4	1-octadecene	metab_8	-	LMFA11000325	333.1	pos	C18H36	21.047	112-88-9	-	-	-	-	-	-	-	-	0.0043	5.2651	5.2895	5.2795	5.2152	5.2333	5.2389	5.4602	5.6653	5.6644	5.793	5.7164	5.8528	5.8908	5.6148	5.7979	5.8287	5.804	5.8811
5	1-octanol	metab_9	C00756	-	187.1	pos	-	36.485	111-87-5	-	-	-	-	-	-	-	-	0.0017	4.825	4.8263	4.8078	4.9245	4.8155	4.8928	5.0368	5.216	5.2026	5.1754	5.219	5.2955	5.1198	5.0442	5.1211	5.1242	5.0569	5.1209
6	1-octen-3-ol	metab_10	C14272	-	205.1	pos	-	25.787	3391-86-4	-	-	-	-	-	-	-	-	0.0033	5.7822	5.843	5.8664	5.8114	5.9078	5.7986	5.7297	5.3977	5.5174	5.4658	5.47	5.3666	5.5298	5.6142	5.6326	5.5532	5.5801	5.6407
7	2-butyne-1,4-diol	metab_17	C02497	-	349.1	pos	-	14.691	110-65-6	-	-	-	-	-	-	-	-	0.0018	4.9559	4.9336	4.8047	4.9149	4.9355	4.9367	4.497	4.6183	4.5421	4.4627	4.5024	4.5779	4.6845	4.2296	4.4154	4.4184	4.3441	4.4313
8	2-ethyltoluene	metab_20	C14572	-	105	pos	-	19.458	-	-	-	-	-	-	-	-	-	0.0024	7.645	7.6497	7.6583	7.7093	7.6476	7.7332	6.6351	6.7204	6.7407	6.6894	6.6565	6.7093	6.4624	6.334	6.8948	6.5563	6.7894	6.6008
9	2-phenylacetamide	metab_26	C02505	HMDB0010715	95.1	pos	C8H9NO	36.486	103-81-1	-	-	map00360	Metabolism	Amino acid metabolism	Benzenoids	Benzene and substituted derivatives	Phenylacetamides	0.0039	4.8225	4.7682	4.8044	4.8151	4.8376	4.8527	5.017	5.1869	5.192	5.1229	5.1915	5.2587	5.1136	5.0314	5.044	5.1491	5.059	5.0715
10	3,4-dihydroxybenzoic acid	metab_30	C00230	HMDB0001856	389.1	pos	C7H6O4	17.987	99-50-3	-	-	map01100;map00400;map01110	Metabolism;Metabolism;Metabolism	Global and overview maps;Amino acid metabolism;Global and overview maps	Benzenoids	Benzene and substituted derivatives	Benzoic acids and derivatives	0.0032	4.8203	4.8267	4.7716	4.7403	4.8129	4.7963	3.8787	3.8371	3.9402	3.858	3.801	3.9606	3.8496	3.8368	3.5224	3.7525	3.7577	3.8964
11	3,5-dihydroxyphenylglycine	metab_31	-	-	147	pos	-	8.862	-	-	-	-	-	-	-	-	-	0.0187	5.4932	5.3762	5.3542	5.1245	5.304	5.3475	5.1087	5.0589	5.1834	5.0587	5.0636	4.971	5.052	5.0692	4.7629	5.0123	5.0013	4.6175
12	3,7-Dihydroxyflavone	metab_32	-	LMPK12111545	383.2	pos	C15H10O4	25.845	-	-	-	-	-	-	-	-	-	0.0015	4.9123	4.93	4.9215	4.9676	4.9517	5.0796	5.2288	5.4154	5.4281	5.3819	5.424	5.4713	5.2482	5.1765	5.1995	5.3189	5.2005	5.323
13	3-methyl-L-histidine	metab_35	C01152	-	325.1	pos	-	21.603	-	-	-	map00340	Metabolism	Amino acid metabolism	-	-	-	0.0136	3.6826	3.7158	3.5925	3.6861	3.5135	3.7499	4.298	4.529	4.5938	4.5432	4.5601	4.618	4.6248	4.5804	4.6185	4.7254	4.6217	4.768
14	4,8-dihydroxyquinoline-2-carboxylic acid (xanthurenic acid)	metab_36	-	-	332.2	pos	-	27.999	-	-	-	-	-	-	-	-	-	0.0113	4.1768	4.0925	4.2179	4.1174	4.13	4.1487	4.6125	4.4279	4.5775	4.5047	4.4754	4.4259	4.7494	4.5787	4.7222	4.6476	4.7386	4.8311
15	4-hydroxybenzyl cyanide	metab_40	C03766	-	190.1	pos	-	11.221	-	-	-	-	-	-	-	-	-	0.0022	6.8164	6.8944	6.6384	6.8771	6.9172	6.5222	6.6999	6.0962	6.1736	6.1383	6.2169	6.1323	6.1225	6.9768	6.5276	6.0627	6.4369	6.313
16	4-hydroxyquinoline	metab_42	C06343	-	219.1	pos	-	30.922	611-36-9	-	-	-	-	-	-	-	-	0.009	5.0658	5.3627	5.2842	5.3925	5.2406	5.4764	5.0144	5.1746	4.9345	5.0125	4.9961	5.0706	4.7951	5.0034	4.9777	5.1718	4.7669	4.9745
17	4-O-Methylphloracetophenone	metab_46	C10680;C00774	-	311.2	pos	-	20.392	-	-	-	-	-	-	-	-	-	0.013	4.0254	4.0321	4.1604	4.2509	4.0454	4.3464	4.6429	4.8629	4.8882	4.8745	4.9079	4.9207	4.8215	4.6809	4.7821	4.837	4.7527	4.8416
18	4-vinylphenol	metab_47	C05627	-	355.2	pos	-	15.745	-	-	-	map00940	Metabolism	Biosynthesis of other secondary metabolites	-	-	-	0.0027	4.1791	4.0962	3.9988	3.9327	3.974	3.7579	4.1534	4.3406	4.4386	4.4075	4.4094	4.4938	4.5385	4.6314	4.8384	4.6658	4.6553	4.4706
19	5,6-dihydro-5-methyluracil	metab_49	C00906	-	107.1	pos	-	36.486	-	-	-	-	-	-	-	-	-	0.0024	4.6628	4.6306	4.6232	4.6602	4.6626	4.7211	4.845	5.0176	5.0107	5.0063	5.0471	5.0965	4.9484	4.8305	4.8439	4.938	4.8634	4.9397
20	5alpha-Androstan-3,7-Dione	metab_50	-	-	389.1	pos	-	24.358	-	-	-	-	-	-	-	-	-	0.0041	4.8235	4.8376	4.8427	4.8265	4.8712	4.7605	4.7158	4.5064	4.5136	4.456	4.5113	4.4096	4.643	5.3738	4.7752	4.6124	4.7176	4.6105
21	5-aminovaleric acid	metab_51	C00431	-	174.1	pos	-	18.383	660-88-8	-	-	map00310;map00330	Metabolism;Metabolism	Amino acid metabolism;Amino acid metabolism	-	-	-	0.0001	5.9332	6.2361	6.1603	6.1552	6.201	6.2122	5.2768	5.4031	5.3207	5.172	5.2391	4.8266	5.0044	4.826	5.5336	5.4938	5.4659	5.6631
22	5-Hydroxy-2',4',7,8-Tetramethoxyflavone	metab_52	-	-	415.2	pos	-	20.149	-	-	-	-	-	-	-	-	-	0.0098	5.629	5.5971	5.522	5.5145	5.5054	5.5596	5.3372	5.3797	5.3248	5.3105	5.2754	5.3033	5.229	5.1153	5.23	5.2155	5.1747	5.193
23	acetol	metab_59	C01405;C05235	-	199.1	pos	-	30.923	-	-	-	map00640	Metabolism	Carbohydrate metabolism	-	-	-	0.0031	5.8065	5.8418	5.8649	5.8318	5.8775	5.8966	5.6057	5.6533	5.6323	5.6543	5.6769	5.6757	5.5313	5.3893	5.5797	5.5867	5.5508	5.6499
24	adrenaline	metab_61	C00788	-	355.2	pos	-	27.944	-	Hormones and transmitters;Hormones and transmitters	Other hormones;Neurotransmitters	map01100;map00350	Metabolism;Metabolism	Global and overview maps;Amino acid metabolism	-	-	-	0.0092	5.2093	5.2228	5.3484	5.3112	5.0199	5.4088	4.4106	4.275	4.2195	4.2911	4.2805	4.1751	4.0767	4.1208	4.1767	4.2176	4.2543	4.1441
25	aspartic acid	metab_65	C00402;C00049;C16433	-	160.1	pos	-	12.256	-	Peptides;Peptides;Hormones and transmitters;-	Amino acids;Amino acids;Neurotransmitters;-	map01100;map00220;map01110;map00770;map00300;map00760;map01210;map00270;map01200;map00260;map01230;map00460;map00250;map00710;map00970;map00261;map02010;map00410;map00340	Metabolism;Metabolism;Metabolism;Metabolism;Metabolism;Metabolism;Metabolism;Metabolism;Metabolism;Metabolism;Metabolism;Metabolism;Metabolism;Metabolism;Genetic Information Processing;Metabolism;Environmental Information Processing;Metabolism;Metabolism	Global and overview maps;Amino acid metabolism;Global and overview maps;Metabolism of cofactors and vitamins;Amino acid metabolism;Metabolism of cofactors and vitamins;Global and overview maps;Amino acid metabolism;Global and overview maps;Amino acid metabolism;Global and overview maps;Metabolism of other amino acids;Amino acid metabolism;Energy metabolism;Translation;Biosynthesis of other second…	-	-	-	0.0023	6.4422	6.5078	6.5544	6.4717	6.5164	6.5636	6.6513	6.7473	6.7133	6.8238	6.8614	6.961	6.9677	6.7522	7.001	6.9969	6.9706	7.0269
26	benzoic acid	metab_66	C00261;C00539;C09815;C00180	HMDB0001870	179	pos	C7H6O2	9.342	65-85-0	-	-	map01100;map01110;map00360	Metabolism;Metabolism;Metabolism	Global and overview maps;Global and overview maps;Amino acid metabolism	Benzenoids	Benzene and substituted derivatives	Benzoic acids and derivatives	0.0008	7.1401	7.1378	7.1983	7.1233	7.1565	7.0438	7.6083	7.6036	7.4502	7.632	7.6597	7.5958	7.6412	7.604	7.7015	7.6286	7.7728	7.7463
27	benzoin	metab_67	C01408	HMDB0032039	179	pos	C14H12O2	13.138	119-53-9	-	-	-	-	-	Phenylpropanoids and polyketides	Stilbenes	Benzoins	0.001	4.2559	4.1941	4.2118	4.1733	4.207	4.3234	5.5992	5.8817	5.7172	5.8833	5.845	5.8696	5.6951	5.3681	5.5553	5.7206	5.6992	5.8078
28	benzyl isothiocyanate	metab_71	C03098	HMDB0033969	276.1	pos	C8H7NS	14.687	622-78-6	-	-	-	-	-	Benzenoids	Benzene and substituted derivatives	-	0.0037	5.1335	5.1486	5.0217	5.1174	5.1314	5.1324	4.7537	4.8192	4.7671	4.7456	4.7101	4.7877	4.9298	4.5599	4.7242	4.707	4.6306	4.7156
29	beta-gentiobiose	metab_73	-	-	361.1	pos	-	28.244	-	-	-	-	-	-	-	-	-	0.0002	6.5049	6.4953	6.5836	6.5932	6.4925	6.4493	6.9709	6.9083	6.8969	6.9403	6.9072	6.7239	7.0395	6.9781	7.1321	7.0248	7.0395	7.0899
30	cellotetraose	metab_79	C02013	-	361.1	pos	-	29.036	-	-	-	-	-	-	-	-	-	0.0016	5.815	5.6626	5.8575	5.8474	5.8418	5.8358	6.3781	6.4856	6.4082	6.5143	6.4846	6.3616	6.2865	6.277	6.4622	6.4238	6.5036	6.5304
31	citramalic acid	metab_81	C00815	HMDB0000426	247.1	pos	C5H8O5	15.103	597-44-4	-	-	-	-	-	Lipids and lipid-like molecules	Fatty Acyls	Fatty acids and conjugates	0.0065	5.253	5.4175	5.4047	5.3311	5.4082	5.4145	5.0071	5.1013	5.1506	5.0304	4.9168	5.1571	5.0664	5.8936	5.1278	5.1048	5.0765	5.2742
32	citric acid	metab_82	C00158	HMDB0000094	273.1	pos	C6H8O7	18.117	77-92-9	Organic acids	Carboxylic acids	map01100;map00630;map01110;map01210;map01200;map01230;map00250;map00020	Metabolism;Metabolism;Metabolism;Metabolism;Metabolism;Metabolism;Metabolism;Metabolism	Global and overview maps;Carbohydrate metabolism;Global and overview maps;Global and overview maps;Global and overview maps;Global and overview maps;Amino acid metabolism;Carbohydrate metabolism	Organic acids and derivatives	Carboxylic acids and derivatives	Tricarboxylic acids and derivatives	0.0007	7.2391	7.2648	7.2427	7.2208	7.2114	7.2742	6.9441	6.914	6.88	6.8516	6.9063	6.9264	6.9788	7.1793	7.05	6.9369	6.9898	6.969
33	D-Ala-D-Ala2	metab_84	-	-	116	pos	-	11.22	-	-	-	-	-	-	-	-	-	0.002	5.9412	6.0605	5.7349	6.0595	6.0973	5.2837	5.9678	5.0778	5.3829	5.4722	5.2878	5.2189	5.4435	6.1871	5.7853	5.3411	5.6252	5.5065
34	D-allose	metab_85	C01487	-	205.1	pos	-	28.658	-	Carbohydrates	Monosaccharides	map02010;map00051	Environmental Information Processing;Metabolism	Membrane transport;Carbohydrate metabolism	-	-	-	0.0023	6.1216	6.2644	6.3078	6.251	6.3161	6.2029	6.4609	6.3625	6.4438	6.4694	6.4201	6.2491	6.63	6.5645	6.7041	6.5634	6.6233	6.6363
35	D-lyxose	metab_93	C00476;C08348	-	103	pos	-	15.862	-	Carbohydrates;-	Monosaccharides;-	map00040	Metabolism	Carbohydrate metabolism	-	-	-	0.0008	5.7235	5.7398	5.7826	5.6735	5.7211	5.7398	5.3637	5.4751	5.4474	5.4138	5.4602	5.4498	5.7048	5.5354	5.7487	5.7101	5.6346	5.7174
36	D-saccharic acid	metab_96	C00818	-	292.1	pos	-	18.039	-	-	-	map01100;map00053	Metabolism;Metabolism	Global and overview maps;Carbohydrate metabolism	-	-	-	0.004	5.1928	5.1642	5.1985	5.1391	5.1807	5.1774	4.92	4.8847	4.7781	4.8159	4.8733	4.8946	4.9743	5.0889	5.0345	4.9574	4.9389	4.9865
37	D-sphingosine	metab_98	-	-	204.1	pos	-	17.938	-	-	-	-	-	-	-	-	-	0.0011	6.071	6.0609	6.0292	6.0259	6.0738	5.9814	5.668	5.6253	5.6949	5.6418	5.7258	5.5853	5.6044	5.6082	5.653	5.5804	5.5931	5.5927
38	eicosane	metab_99	-	HMDB0059909;LMFA11000571	204.1	pos	C20H42	23.903	112-95-8	-	-	-	-	-	Hydrocarbons	Alkanes	Acyclic alkanes	0.0053	5.6155	5.6249	5.6362	5.6004	5.6141	5.6398	5.2948	5.3577	5.3502	5.2895	5.2662	5.2952	5.1857	5.1343	5.2891	5.0411	5.2236	5.2882
39	eicosapentaenoic acid	metab_100	C06428	HMDB0001999	305.1	pos	C20H30O2	23.906	10417-94-4	Lipids	Fatty acids	map01040	Metabolism	Lipid metabolism	Lipids and lipid-like molecules	Fatty Acyls	Fatty acids and conjugates	0.0123	4.5524	4.6284	4.5282	4.5985	4.6041	4.6499	4.2226	4.2371	4.2602	4.163	4.2345	4.234	4.0649	3.9076	3.9478	3.9825	3.9157	4.159
40	epicatechin	metab_101	C09727;C06562	LMPK12020003;HMDB0001871	355.2	pos	C15H14O6	28.876	490-46-0	-	-	map00941;map01110	Metabolism;Metabolism	Biosynthesis of other secondary metabolites;Global and overview maps	Phenylpropanoids and polyketides	Flavonoids	Flavans	0.0102	4.47	4.6206	4.5164	4.4219	4.2234	4.1736	4.7498	4.7137	3.8674	3.8228	4.6424	4.8192	4.8962	5.2466	5.0643	5.1543	5.1754	5.0957
41	ethanolamine	metab_102	C00189	HMDB0000149	174.1	pos	C2H7NO	17.074	141-43-5	Peptides	Amines	map01100;map00564	Metabolism;Metabolism	Global and overview maps;Lipid metabolism	Organic nitrogen compounds	Organonitrogen compounds	Amines	0.008	6.1502	6.5715	6.4967	6.4253	6.5573	6.4718	5.8721	5.6979	5.8436	5.859	5.7619	5.7756	5.4716	5.4408	5.6184	5.4079	5.7208	5.6792
42	farnesal	metab_103	C16501;C03461	-	145	pos	-	23.759	-	-	-	map00909;map00900	Metabolism;Metabolism	Metabolism of terpenoids and polyketides;Metabolism of terpenoids and polyketides	-	-	-	0.0157	3.5767	3.1776	3.4002	3.6528	2.9635	3.6571	3.912	4.0944	4.2307	4.1667	4.2259	4.3314	4.4783	4.2918	4.4469	4.5072	4.4675	4.4763
43	fluorene	metab_104	C07715	-	165	pos	-	19.458	86-73-7	-	-	map01100	Metabolism	Global and overview maps	-	-	-	0.0067	6.0869	6.1129	6.1454	6.1778	6.1246	6.1963	5.3894	5.292	5.3805	5.4541	5.455	5.3453	5.3283	4.9307	5.4325	5.4594	5.482	5.4544
44	Flurazepam	metab_105	-	HMDB0014828	86	pos	C21H23ClFN3O	7.827	17617-23-1	-	-	-	-	-	Organoheterocyclic compounds	Benzodiazepines	1,4-benzodiazepines	0.0041	4.4718	4.8524	4.2995	4.7817	4.6526	4.9573	4.6091	4.8599	4.9069	4.5927	4.8145	4.8513	5.0574	5.0902	5.454	5.167	5.1737	5.4167
45	fructose-1,6-diphosphate	metab_107	C00354	-	315.1	pos	-	24.045	-	-	-	map01100;map00400;map01110;map01200;map00710	Metabolism;Metabolism;Metabolism;Metabolism;Metabolism	Global and overview maps;Amino acid metabolism;Global and overview maps;Global and overview maps;Energy metabolism	-	-	-	0.0026	5.8871	5.8662	5.7961	5.7873	5.9123	5.8421	5.7408	5.4696	5.5514	5.5169	5.5386	5.4071	5.5838	5.828	5.7787	5.5536	5.649	5.5829
46	galactonic acid	metab_110	C00880	HMDB0000565	333.1	pos	C6H12O7	20.572	13382-27-9	-	-	map01100;map00052	Metabolism;Metabolism	Global and overview maps;Carbohydrate metabolism	Organic acids and derivatives	Hydroxy acids and derivatives	Medium-chain hydroxy acids and derivatives	0.0024	5.0912	5.0908	5.155	4.9561	5.0377	6.3324	6.3154	6.056	6.5408	6.5011	6.4656	6.5474	6.6807	6.6029	6.6027	6.6904	6.5452	6.6818
47	galactosamine	metab_111	-	-	116	pos	-	26.789	7535-00-4	-	-	-	-	-	-	-	-	0.0098	4.9053	5.2753	4.9213	5.2572	4.9731	4.8601	6.0301	5.2907	5.5695	5.566	5.4354	5.7187	5.9015	5.9757	6.1555	5.8498	5.8437	5.7473
48	galacturonic acid	metab_112	C08348	HMDB0002545	333.1	pos	C6H10O7	19.868	14982-50-4	-	-	-	-	-	Organic oxygen compounds	Organooxygen compounds	Carbohydrates and carbohydrate conjugates	0.0013	5.1023	4.9537	5.038	5.0134	5.0233	5.0886	5.5834	6.0489	5.9377	6.1317	5.9724	6.1048	6.2585	5.9516	6.2125	6.1374	6.1524	6.2661
49	gluconic acid	metab_113	C00257	HMDB0000625	292.1	pos	C6H12O7	20.53	133-42-6;526-95-4	Carbohydrates	Monosaccharides	map01100;map00030;map01110;map01200	Metabolism;Metabolism;Metabolism;Metabolism	Global and overview maps;Carbohydrate metabolism;Global and overview maps;Global and overview maps	Organic oxygen compounds	Organooxygen compounds	Carbohydrates and carbohydrate conjugates	0.0006	6.3605	6.3478	6.3711	6.2967	6.305	6.405	6.3969	6.5543	6.5567	6.4957	6.4694	6.5847	6.7037	6.6288	6.6621	6.7202	6.5725	6.6866
50	heptadecanoic acid	metab_118	-	HMDB0002259;LMFA01010017	327.1	pos	C17H34O2	21.747	506-12-7	-	-	-	-	-	Lipids and lipid-like molecules	Fatty Acyls	Fatty acids and conjugates	0.005	4.6568	4.6377	4.6345	4.6367	4.7508	4.8615	5.1069	5.3357	5.3517	5.333	5.3539	5.397	5.108	5.0762	5.13	5.1613	5.074	5.22
51	hypotaurine	metab_120	C00519	HMDB0000965	299.2	pos	C2H7NO2S	17.611	300-84-5	-	-	map01100;map00430	Metabolism;Metabolism	Global and overview maps;Metabolism of other amino acids	Organic acids and derivatives	Sulfinic acids and derivatives	Sulfinic acids	0.0051	5.6378	5.6841	5.6774	5.6587	5.6849	5.6688	5.2943	5.3454	5.3165	5.3366	5.3663	5.3364	5.4135	5.3875	5.4804	5.4937	5.4459	5.3976
52	inosine	metab_122	C00294	HMDB0000195	245.1	pos	C10H12N4O5	26.466	58-63-9	-	-	map01100;map00230	Metabolism;Metabolism	Global and overview maps;Nucleotide metabolism	Nucleosides, nucleotides, and analogues	Purine nucleosides	-	0.0001	4.7543	4.7091	4.7552	4.788	4.5348	4.8176	5.1735	5.4438	5.307	5.417	5.456	5.485	5.3507	5.1533	5.2119	5.383	5.2783	5.2651
53	L-asparagine	metab_126	C00152	HMDB0000168	116	pos	C4H8N2O3	16.057	70-47-3	Peptides	Amino acids	map01100;map01110;map00460;map01230;map00250;map00970	Metabolism;Metabolism;Metabolism;Metabolism;Metabolism;Genetic Information Processing	Global and overview maps;Global and overview maps;Metabolism of other amino acids;Global and overview maps;Amino acid metabolism;Translation	Organic acids and derivatives	Carboxylic acids and derivatives	Amino acids, peptides, and analogues	0.0089	7.9165	7.8473	7.8595	7.8352	7.8118	7.8946	7.3265	7.3104	7.2268	7.2265	7.2701	7.154	7.2305	7.2517	6.7182	6.8884	7.1344	6.512
54	L-histidine	metab_131	C00135	HMDB0000177	436.2	pos	C6H9N3O2	18.738	71-00-1	Peptides	Amino acids	map01100;map01110;map00340;map02010;map01230;map00970;map00410	Metabolism;Metabolism;Metabolism;Environmental Information Processing;Metabolism;Genetic Information Processing;Metabolism	Global and overview maps;Global and overview maps;Amino acid metabolism;Membrane transport;Global and overview maps;Translation;Metabolism of other amino acids	Organic acids and derivatives	Carboxylic acids and derivatives	Amino acids, peptides, and analogues	0.0019	4.4293	4.4579	4.4667	4.3998	4.3462	4.4397	5.1849	4.6727	4.744	4.6072	4.6239	4.7977	4.9394	5.5278	5.2079	4.8537	4.8594	4.9672
55	L-proline	metab_134	C00148	HMDB0000162	275.1	pos	C5H9NO2	14.691	147-85-3	Peptides	Amino acids	map01100;map01110;map02010;map00330;map01230;map00970	Metabolism;Metabolism;Environmental Information Processing;Metabolism;Metabolism;Genetic Information Processing	Global and overview maps;Global and overview maps;Membrane transport;Amino acid metabolism;Global and overview maps;Translation	Organic acids and derivatives	Carboxylic acids and derivatives	Amino acids, peptides, and analogues	0.002	5.7472	5.7229	5.6036	5.7014	5.7277	5.7232	5.2862	5.3868	5.324	5.2477	5.2744	5.3462	5.4701	4.9865	5.1822	5.1575	5.0632	5.2024
56	L-serine	metab_135	C00065	HMDB0000187	217.1	pos	C3H7NO3	16.87	56-45-1	Peptides	Amino acids	map01100;map00630;map01110;map00920;map01502;map00460;map00270;map01200;map01230;map00600;map02010;map00260;map00261;map00970	Metabolism;Metabolism;Metabolism;Metabolism;Human Diseases;Metabolism;Metabolism;Metabolism;Metabolism;Metabolism;Environmental Information Processing;Metabolism;Metabolism;Genetic Information Processing	Global and overview maps;Carbohydrate metabolism;Global and overview maps;Energy metabolism;Drug resistance: Antimicrobial;Metabolism of other amino acids;Amino acid metabolism;Global and overview maps;Global and overview maps;Lipid metabolism;Membrane transport;Amino acid metabolism;Biosynthesis of other secondary metabolites;Translation	Organic acids and derivatives	Carboxylic acids and derivatives	Amino acids, peptides, and analogues	0.0198	5.7386	5.7472	5.7502	5.5524	5.7365	5.7963	5.3613	5.4237	5.4613	5.4387	5.4414	5.4211	5.8185	5.4119	5.5903	5.5818	5.7825	5.8511
57	maleamic acid	metab_138	C01596	-	244.1	pos	-	14.303	-	-	-	map00760	Metabolism	Metabolism of cofactors and vitamins	-	-	-	0.0032	5.4046	5.4907	5.487	5.4944	5.5454	5.5659	4.942	4.7523	4.8803	4.8699	4.8185	4.7953	4.8057	4.7294	4.7836	4.7483	4.7423	4.8564
58	mandelic acid	metab_141	C01984	HMDB0000703	179	pos	C8H8O3	13.138	90-64-2	-	-	-	-	-	Benzenoids	Benzene and substituted derivatives	-	0.001	4.2559	4.1941	4.2118	4.1733	4.207	4.3234	5.5992	5.8817	5.7172	5.8833	5.845	5.8696	5.6951	5.3681	5.5553	5.7206	5.6992	5.8078
59	mandelonitrile	metab_142	C00561	HMDB0060486	190.1	pos	C8H7NO	11.221	-	-	-	map00460;map01110	Metabolism;Metabolism	Metabolism of other amino acids;Global and overview maps	Benzenoids	Benzene and substituted derivatives	-	0.0022	6.8164	6.8944	6.6384	6.8771	6.9172	6.5222	6.6999	6.0962	6.1736	6.1383	6.2169	6.1323	6.1225	6.9768	6.5276	6.0627	6.4369	6.313
60	melatonin	metab_143	C01598	HMDB0001389	237.1	pos	C13H16N2O2	25.344	73-31-4	Hormones and transmitters	Other hormones	map01100;map00380	Metabolism;Metabolism	Global and overview maps;Amino acid metabolism	Organoheterocyclic compounds	Indoles and derivatives	Indoles	0.0108	5.1229	5.0628	5.1482	5.145	5.084	5.1174	5.4473	5.6109	5.557	5.6033	5.6043	5.5086	5.5448	5.4831	5.576	5.5694	5.6407	5.6111
61	Methamphetamine	metab_144	C07164	HMDB0015517	171	pos	C10H15N	26.97	537-46-2	-	-	-	-	-	Benzenoids	Benzene and substituted derivatives	Phenethylamines	0.0059	4.5471	4.4836	4.4874	4.4729	4.52	4.5062	4.7379	4.9664	5.0057	4.8458	4.9882	4.8877	4.6886	4.7221	4.7378	4.7568	4.6734	4.7286
62	N-omega-acetylhistamine	metab_155	C05135	-	209	pos	-	25.402	-	-	-	map00340	Metabolism	Amino acid metabolism	-	-	-	0.0011	4.3781	4.5646	4.5681	4.4213	4.5942	4.5765	4.1916	4.0706	4.1819	4.1591	4.2422	4.1825	4.1703	3.6521	4.247	4.2411	4.2722	4.464
63	oxalic acid	metab_158	C00209	HMDB0002329	147	pos	C2H2O4	7.623	7404-49-1;144-62-7	Organic acids	Carboxylic acids	map01100;map00630	Metabolism;Metabolism	Global and overview maps;Carbohydrate metabolism	Organic acids and derivatives	Carboxylic acids and derivatives	Dicarboxylic acids and derivatives	0.0167	6.7415	6.8827	6.8281	6.8625	6.8657	6.9353	6.9583	7.0005	7.0519	6.9899	6.9438	6.9803	6.837	6.7403	5.7316	6.5977	6.2819	5.8988
64	palmitic acid	metab_159	C00249	HMDB0000220;LMFA01010001	313.2	pos	C16H32O2	20.621	1957-10-03	Lipids	Fatty acids	map01100;map00071;map01212;map00073;map00061;map00062;map01040	Metabolism;Metabolism;Metabolism;Metabolism;Metabolism;Metabolism;Metabolism	Global and overview maps;Lipid metabolism;Global and overview maps;Lipid metabolism;Lipid metabolism;Lipid metabolism;Lipid metabolism	Lipids and lipid-like molecules	Fatty Acyls	Fatty acids and conjugates	0.0038	6.5186	6.4888	6.4752	6.476	6.4715	6.5538	6.8065	6.9766	6.9953	6.9405	6.9654	7.0236	6.8066	6.7136	6.8032	6.8567	6.8179	6.8653
65	p-cresol	metab_160	C01468	HMDB0001858	180	pos	C7H8O	14.993	106-44-5	-	-	map01100	Metabolism	Global and overview maps	Benzenoids	Phenols	Cresols	0.0005	4.8818	4.8513	4.9459	4.8785	4.8447	4.9736	6.2097	6.4561	6.3685	6.4516	6.4708	6.464	6.1458	5.8638	6.0313	6.2139	6.0937	6.2196
66	phenanthrene	metab_163	C11422	-	148	pos	-	7.623	1985-01-08	-	-	map01100	Metabolism	Global and overview maps	-	-	-	0.0096	5.9772	6.1277	6.094	6.0906	6.0939	6.1578	6.1831	6.264	6.2791	6.2103	6.1693	6.2376	6.0563	5.9597	4.9439	5.8178	5.5184	5.1205
67	phenylphosphoric acid	metab_167	-	-	481.2	pos	-	28.244	-	-	-	-	-	-	-	-	-	0.0034	4.4628	4.4322	4.4811	4.5217	4.5651	4.3215	4.9139	4.7992	4.8256	4.8668	4.8392	4.7131	4.913	4.9064	5.0265	4.8797	4.9263	4.9526
68	phlorobenzophenone	metab_168	-	-	359.1	pos	-	17.793	-	-	-	-	-	-	-	-	-	0.0228	5.54	5.6758	5.6842	5.5936	5.5222	5.6045	4.6827	4.3105	4.2521	4.3132	4.3374	4.3513	4.4689	4.3135	4.1293	4.2948	4.4698	3.8222
69	pipecolic acid	metab_172	C00408	HMDB0000070	84	pos	C6H11NO2	13.515	535-75-1	-	-	map01100;map00960;map00310;map01110	Metabolism;Metabolism;Metabolism;Metabolism	Global and overview maps;Biosynthesis of other secondary metabolites;Amino acid metabolism;Global and overview maps	Organic acids and derivatives	Carboxylic acids and derivatives	Amino acids, peptides, and analogues	0.0019	5.1011	4.2842	5.353	4.6991	4.3882	4.5984	5.7156	5.6505	5.7079	5.7196	5.8452	5.9087	5.8866	5.7286	6.1028	6.0959	5.9211	6.2283
70	putrescine	metab_174	C02896;C00134	HMDB0001414	174.1	pos	C4H12N2	16.888	110-60-1	-;Peptides	-;Amines	map01100;map00480;map01110;map00960;map02010;map00330	Metabolism;Metabolism;Metabolism;Metabolism;Environmental Information Processing;Metabolism	Global and overview maps;Metabolism of other amino acids;Global and overview maps;Biosynthesis of other secondary metabolites;Membrane transport;Amino acid metabolism	Organic nitrogen compounds	Organonitrogen compounds	Amines	0.0084	5.9883	5.9406	5.9236	5.9015	5.9422	5.962	6.4051	6.4535	6.6292	6.5342	6.5054	6.465	6.6247	6.4569	6.5148	6.5634	6.5111	6.4199
71	quinic acid	metab_176	C00296;C06746	HMDB0003072	345.1	pos	C7H12O6	18.737	77-95-2	-	-	map00400	Metabolism	Amino acid metabolism	Organic oxygen compounds	Organooxygen compounds	Alcohols and polyols	0.0009	6.2527	6.2747	6.2681	6.186	6.1854	6.2227	6.9637	6.4497	6.5024	6.4362	6.4925	6.5286	6.713	7.2675	6.9885	6.6632	6.7054	6.71
72	stigmasterol	metab_182	C05442	LMST01040123;HMDB0000937	484.4	pos	C29H48O	32.62	83-48-7	Steroids	29-Carbon atoms	map01110;map00100	Metabolism;Metabolism	Global and overview maps;Lipid metabolism	Lipids and lipid-like molecules	Steroids and steroid derivatives	Stigmastanes and derivatives	0.0043	4.9238	4.9371	4.9126	5.0035	4.9271	5.0423	5.2819	5.418	5.4659	5.4366	5.4536	5.5274	5.339	5.2416	5.2583	5.3947	5.2744	5.4126
73	Sucrose	metab_184	C00089	HMDB0000258	362.2	pos	C12H22O11	27.356	57-50-1	Carbohydrates	Oligosaccharides	map01100;map00500;map02010;map00052	Metabolism;Metabolism;Environmental Information Processing;Metabolism	Global and overview maps;Carbohydrate metabolism;Membrane transport;Carbohydrate metabolism	Organic oxygen compounds	Organooxygen compounds	Carbohydrates and carbohydrate conjugates	0.0007	6.9486	6.9319	7.046	7.0057	7.1449	6.908	6.8421	6.5555	6.6758	6.5349	6.5689	6.3601	6.6383	6.6797	6.5652	6.5658	6.5718	6.6502
74	xanthotoxin	metab_195	C01864	-	341.2	pos	-	22.828	-	-	-	-	-	-	-	-	-	0.0081	6.1186	6.0726	6.0712	6.0677	6.0332	6.0919	6.2241	6.3906	6.4099	6.3736	6.3785	6.437	6.2539	6.1891	6.2255	6.2877	6.2224	6.3028
